# Supplementary material for: Evolutionary Analysis Points to Divergent Physiological Roles of Type 1 Fimbriae in Salmonella and Escherichia coli
Source: PubMed Central journal article supplement — mBio. 2013 Mar 5;4(2):e00625-12. doi: 10.1128/mBio.00625-12 (PMC3604780; doi:10.1128/mbio.00625-12), 2013-03-05
Supplement: mbo001131459sf03.pdf [file mbo001131459sf03.pdf]

# A. E. coli

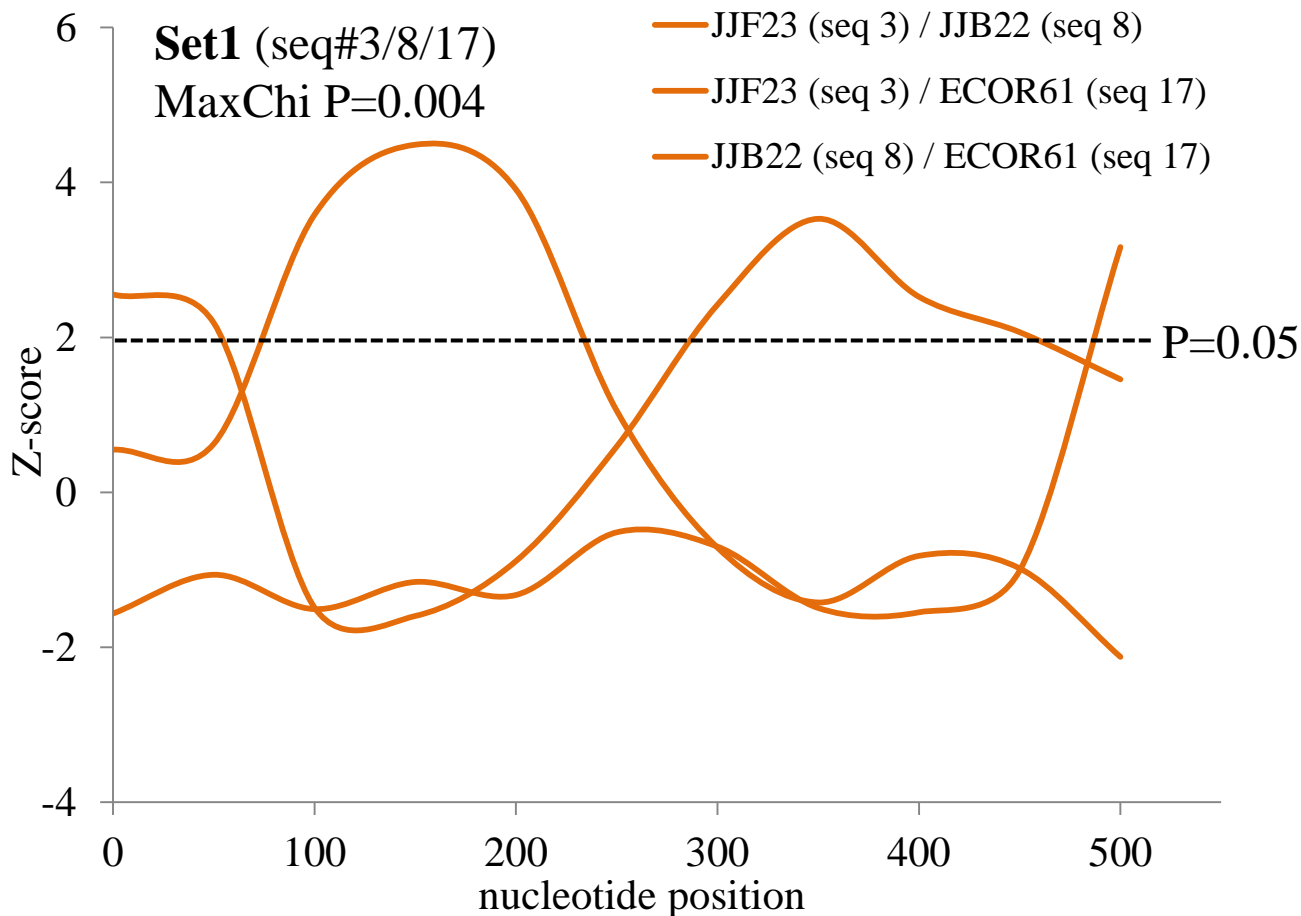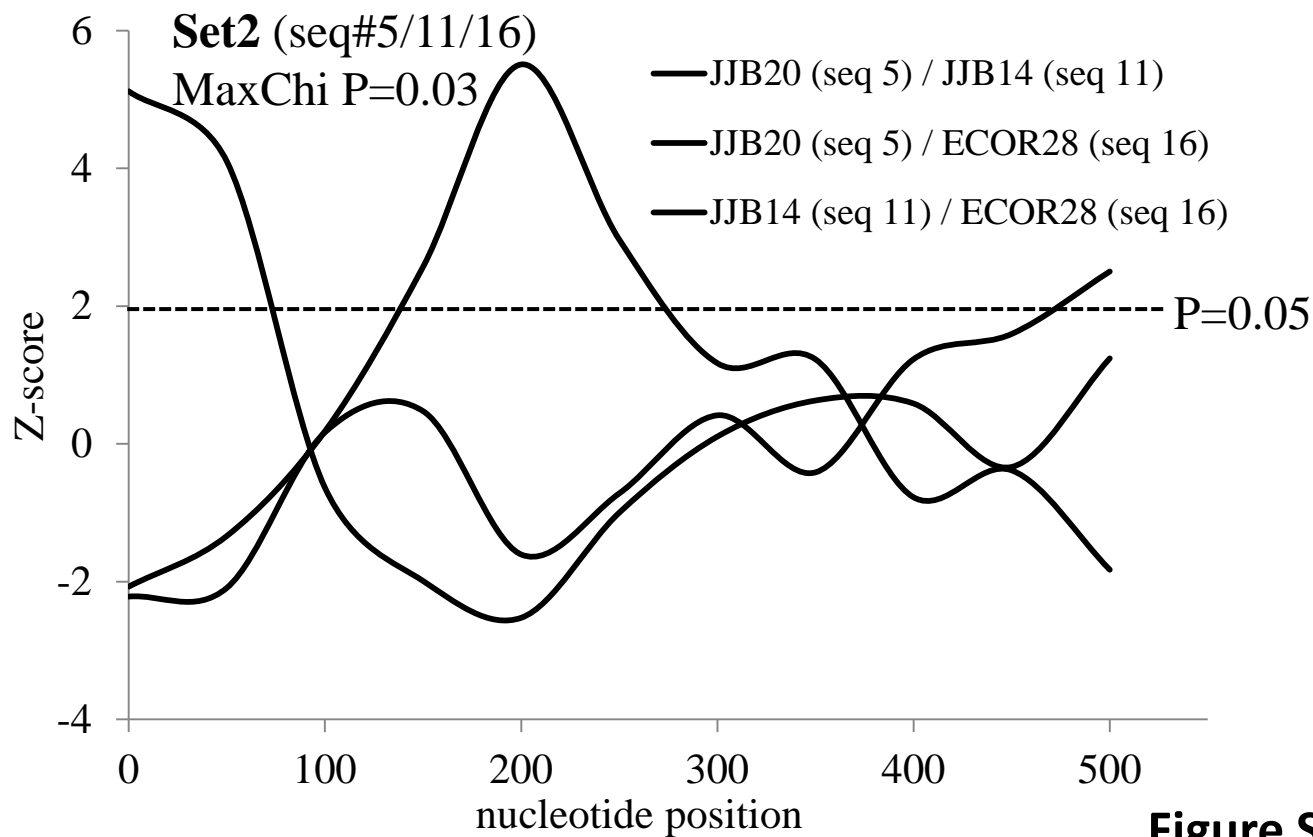

**Figure S3**

**A. E. coli**

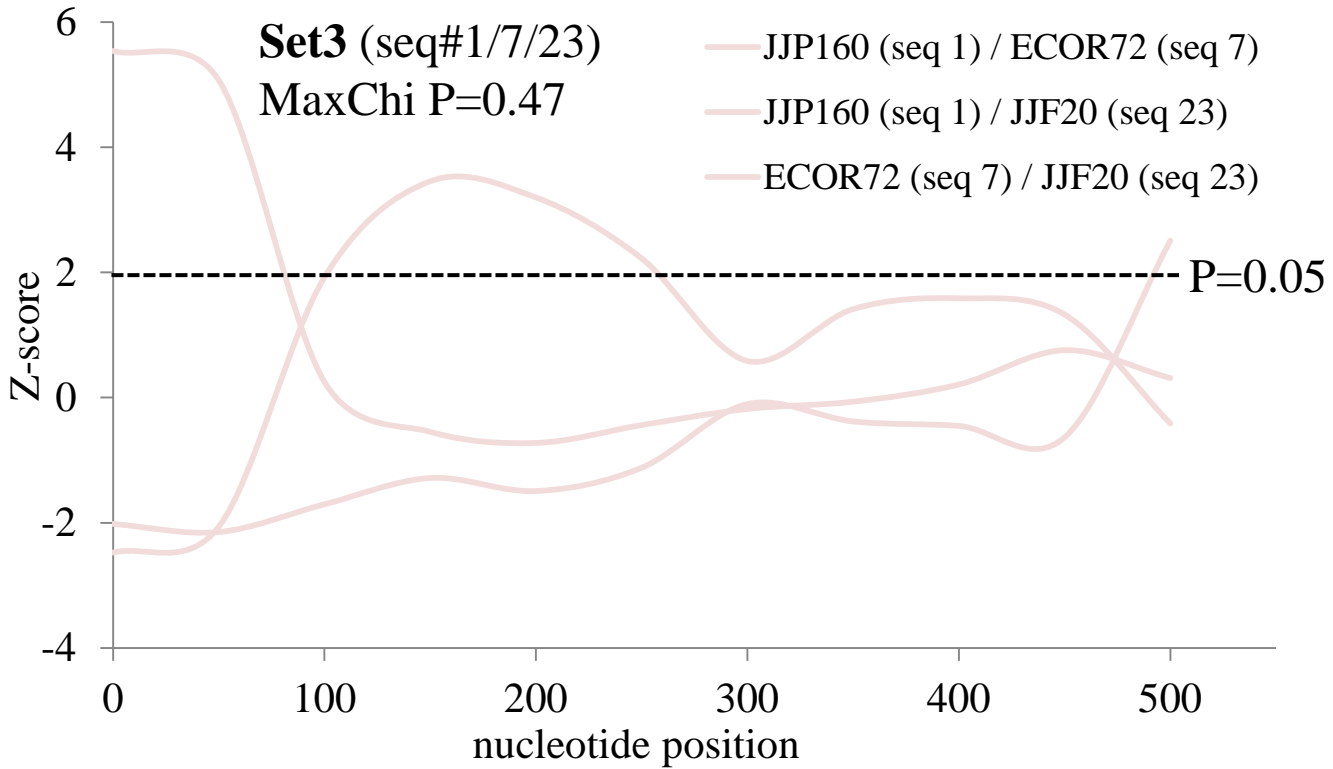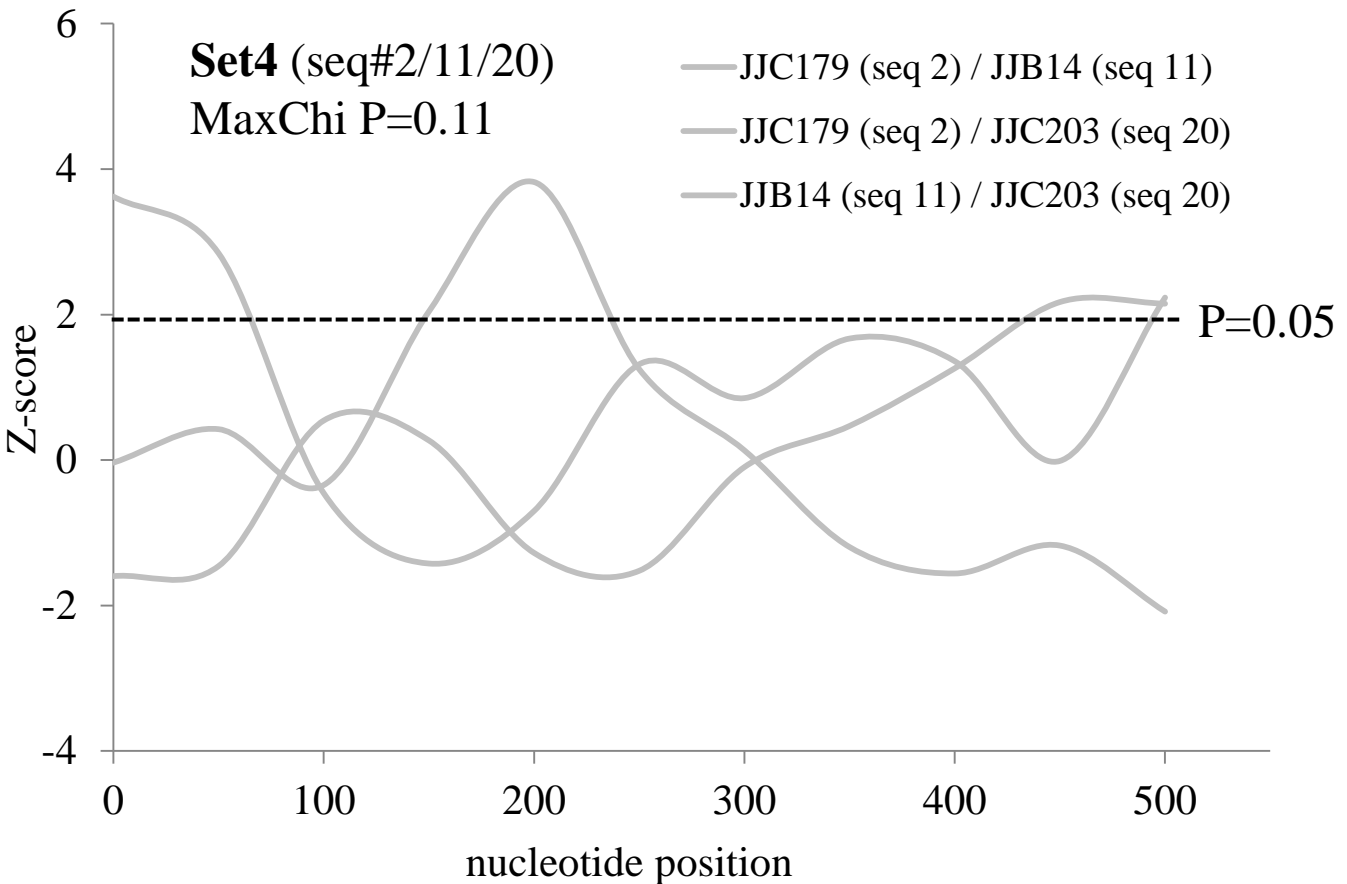

**Figure S3**

# A. E. coli

**Set5** (seq#2/13/20)

MaxChi P=0.003

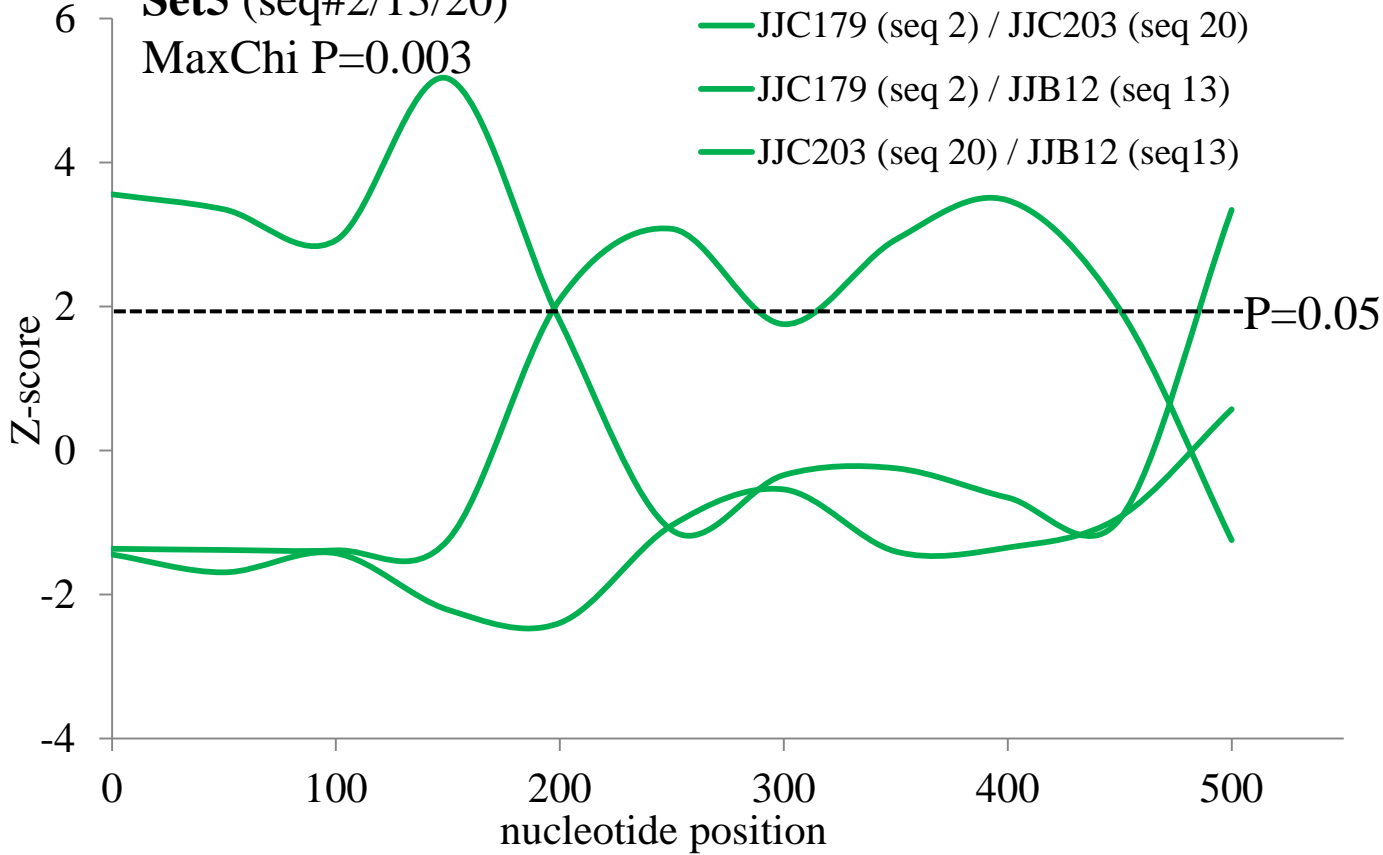

**Set6** (seq#7/17/22)

MaxChi P=0.07

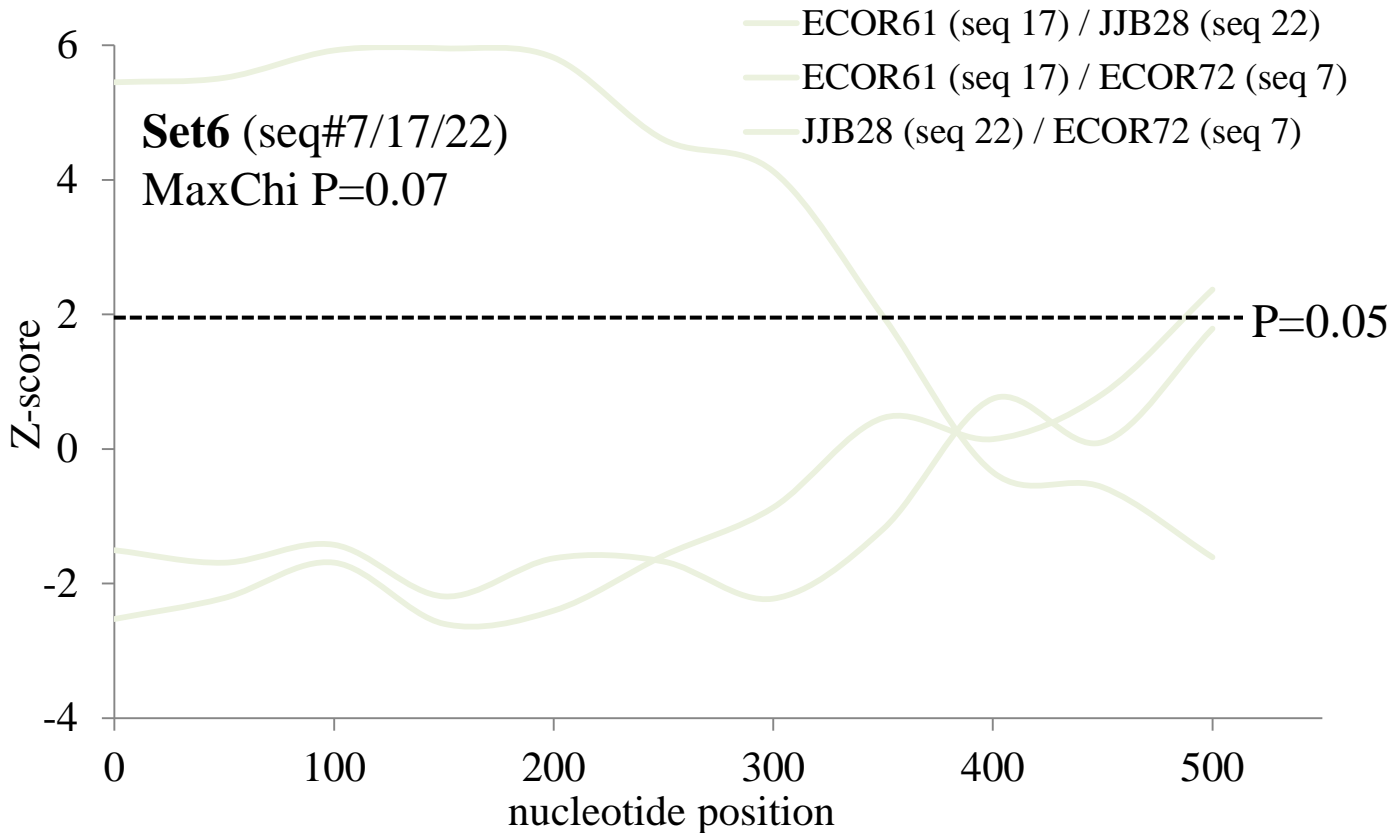

**Figure S3**

# A. E. coli

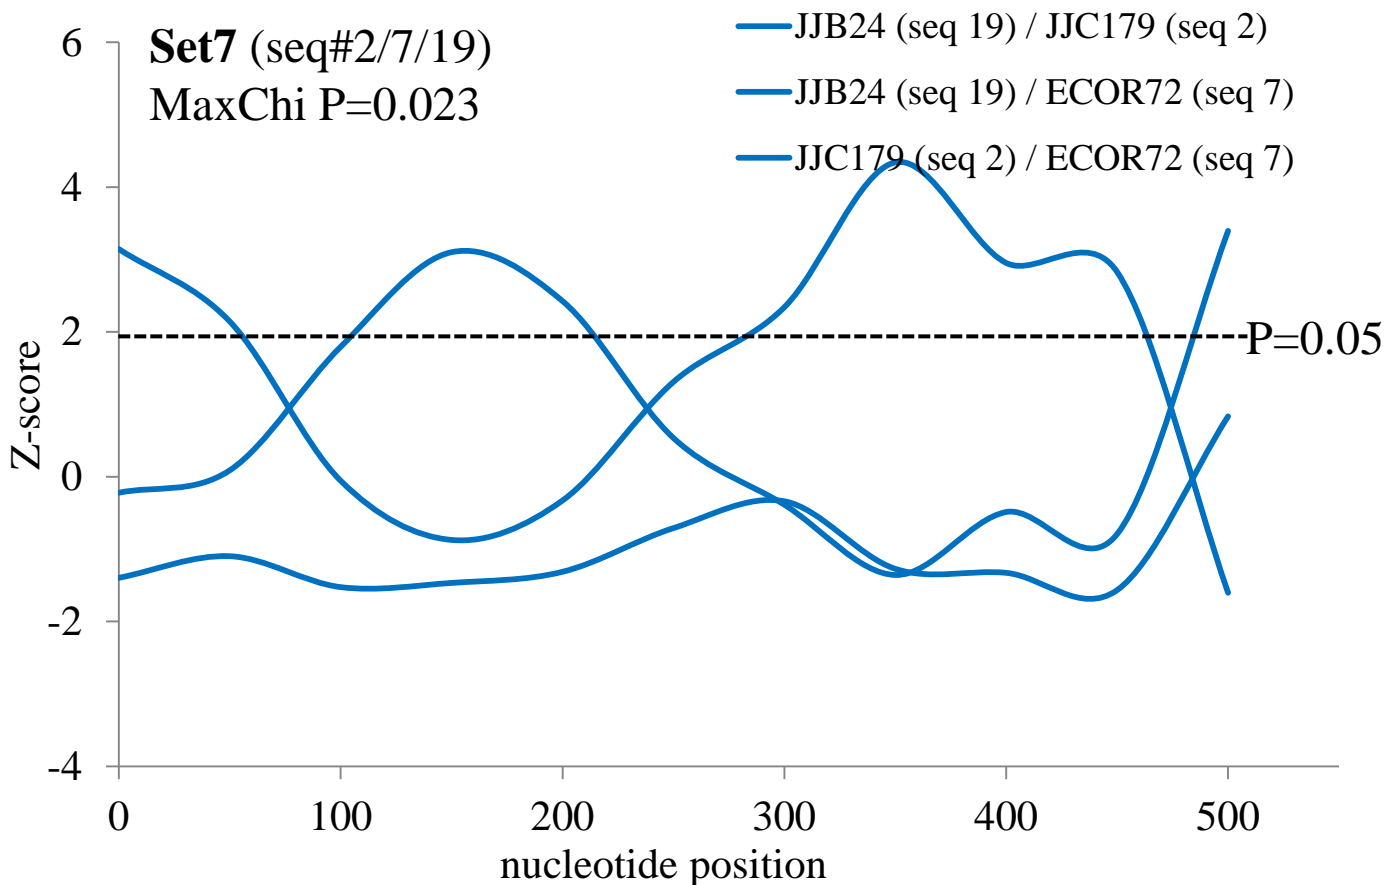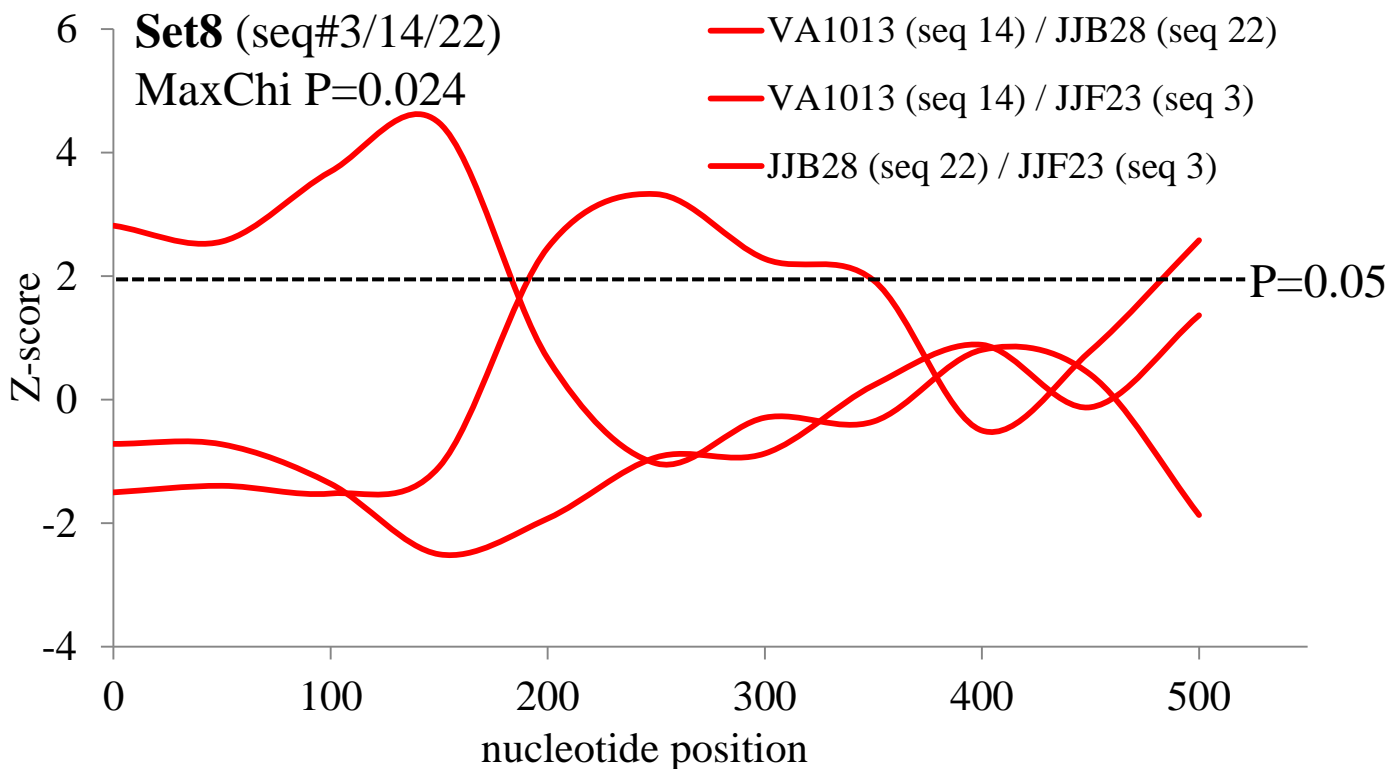

**Figure S3**

# A. E. coli

**Set9** (seq#6/11/18)

MaxChi P=0.12

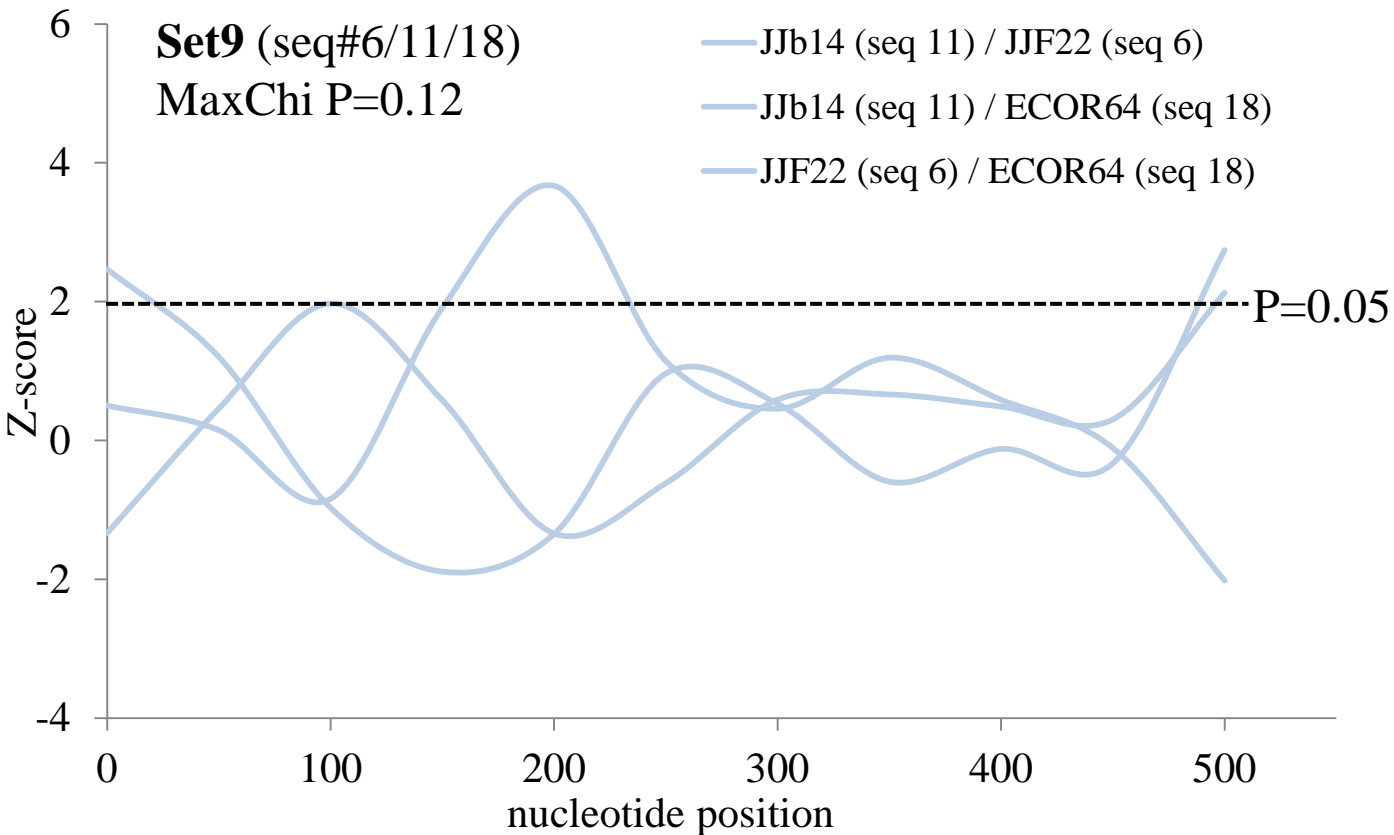

**Set10** (seq#5/16/21)

MaxChi P=0.41

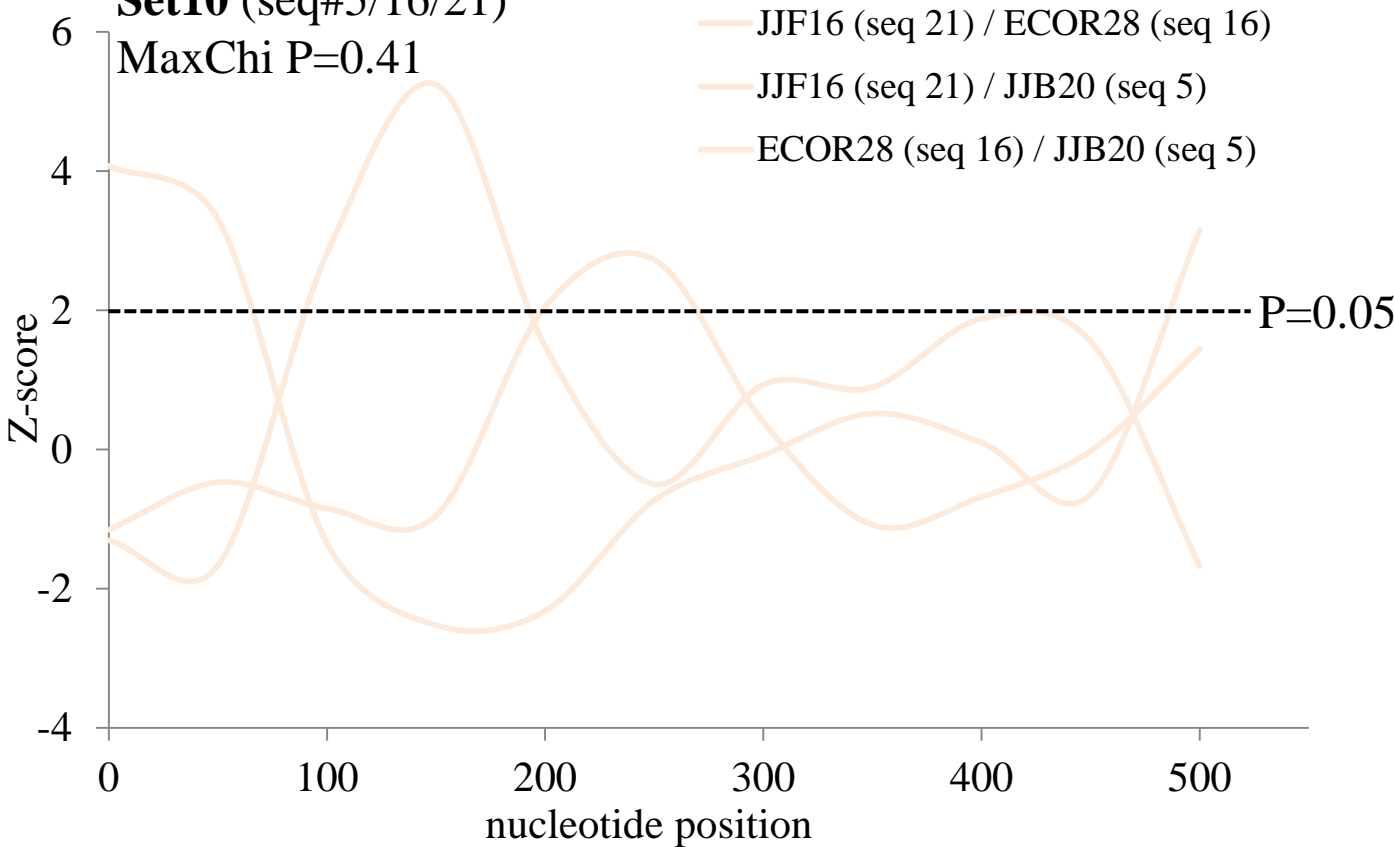

**Figure S3**

## ***B. S. enterica***

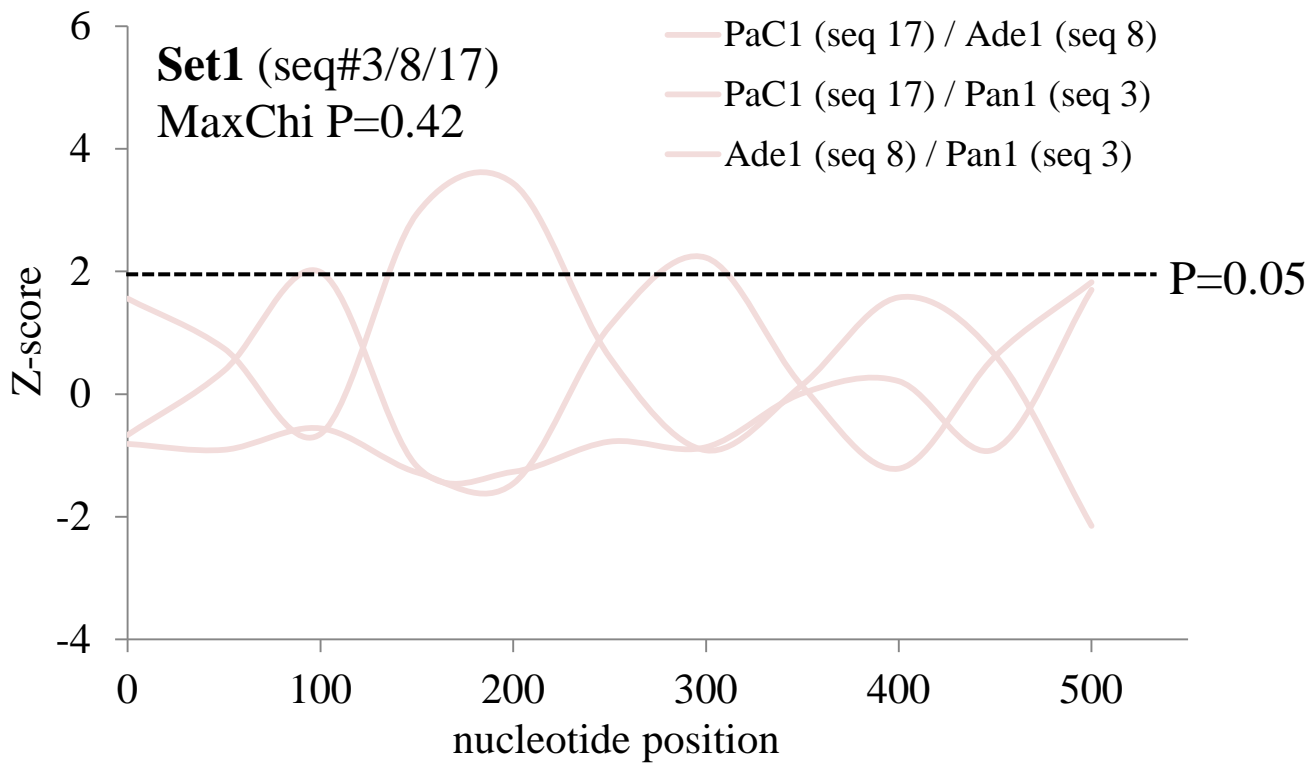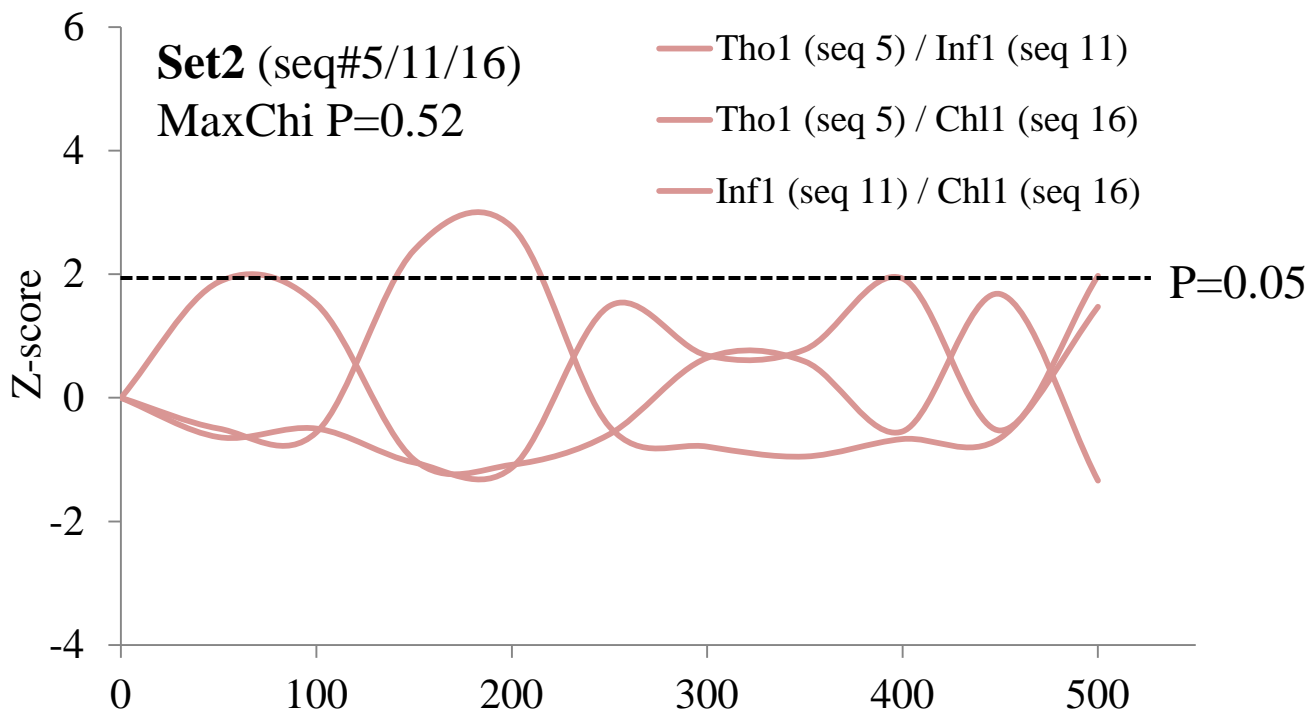

**Figure S3**

# B. S. enterica

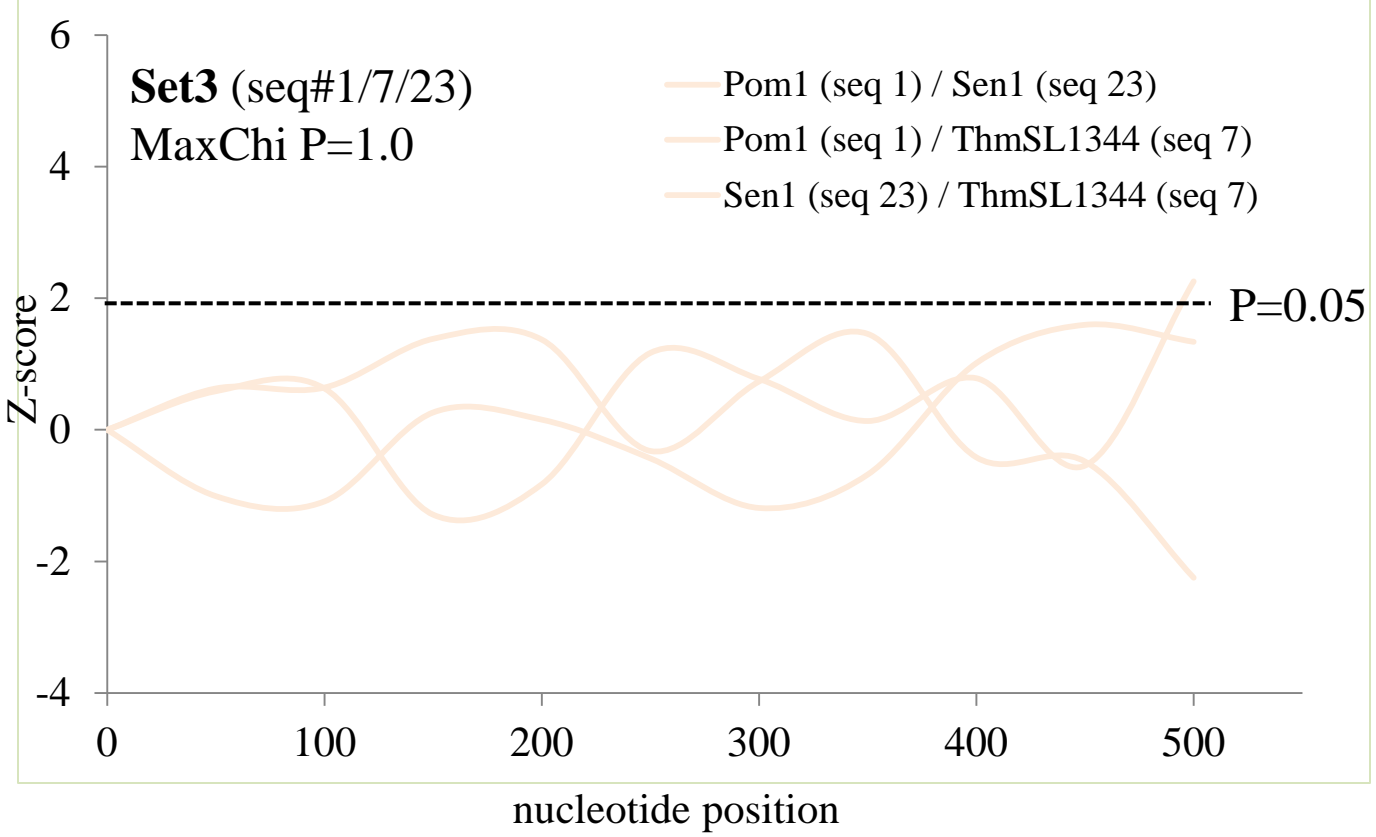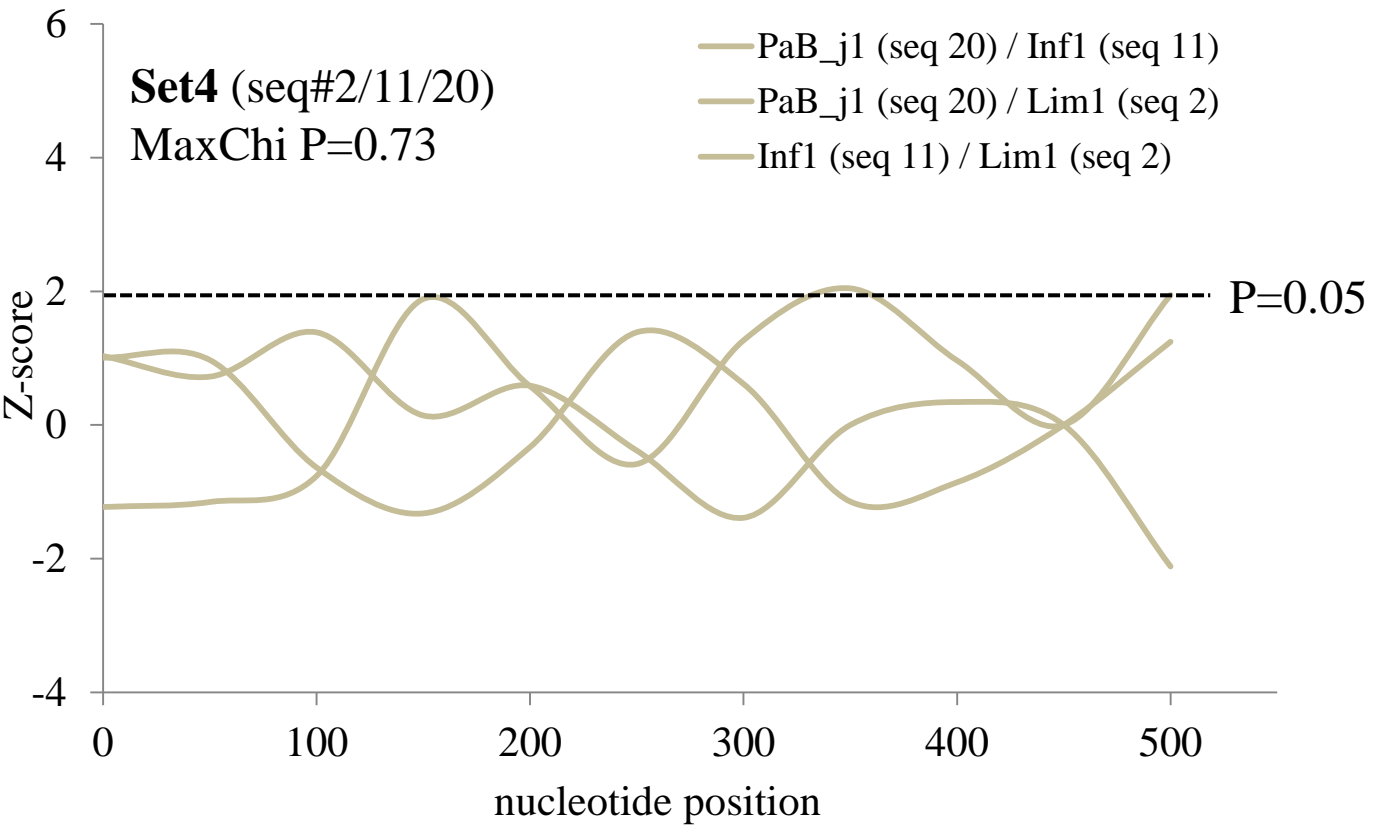

**Figure S3**

## B. *S. enterica*

**Set5** (seq#2/13/20)

MaxChi P=1.0

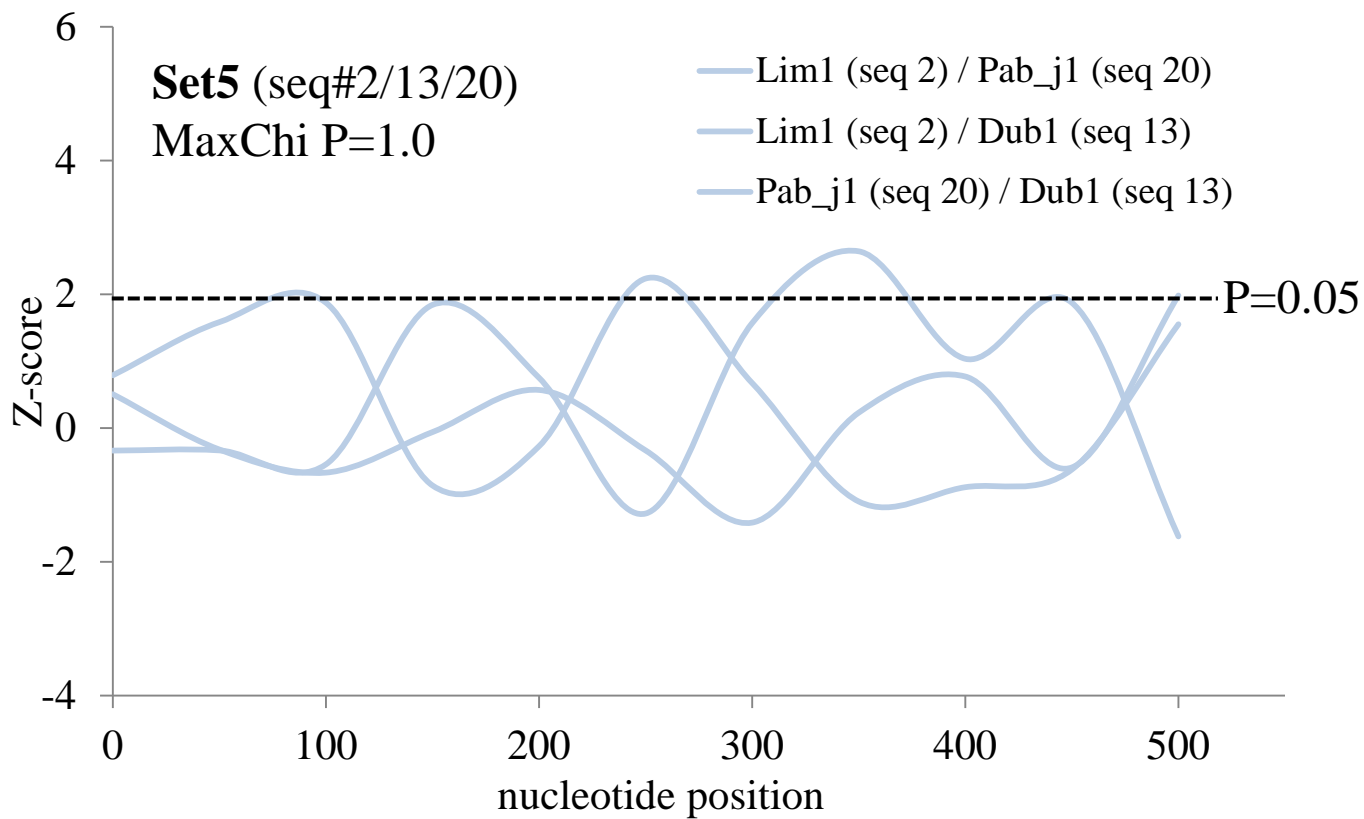

**Set6** (seq#7/17/22)

MaxChi P=0.84

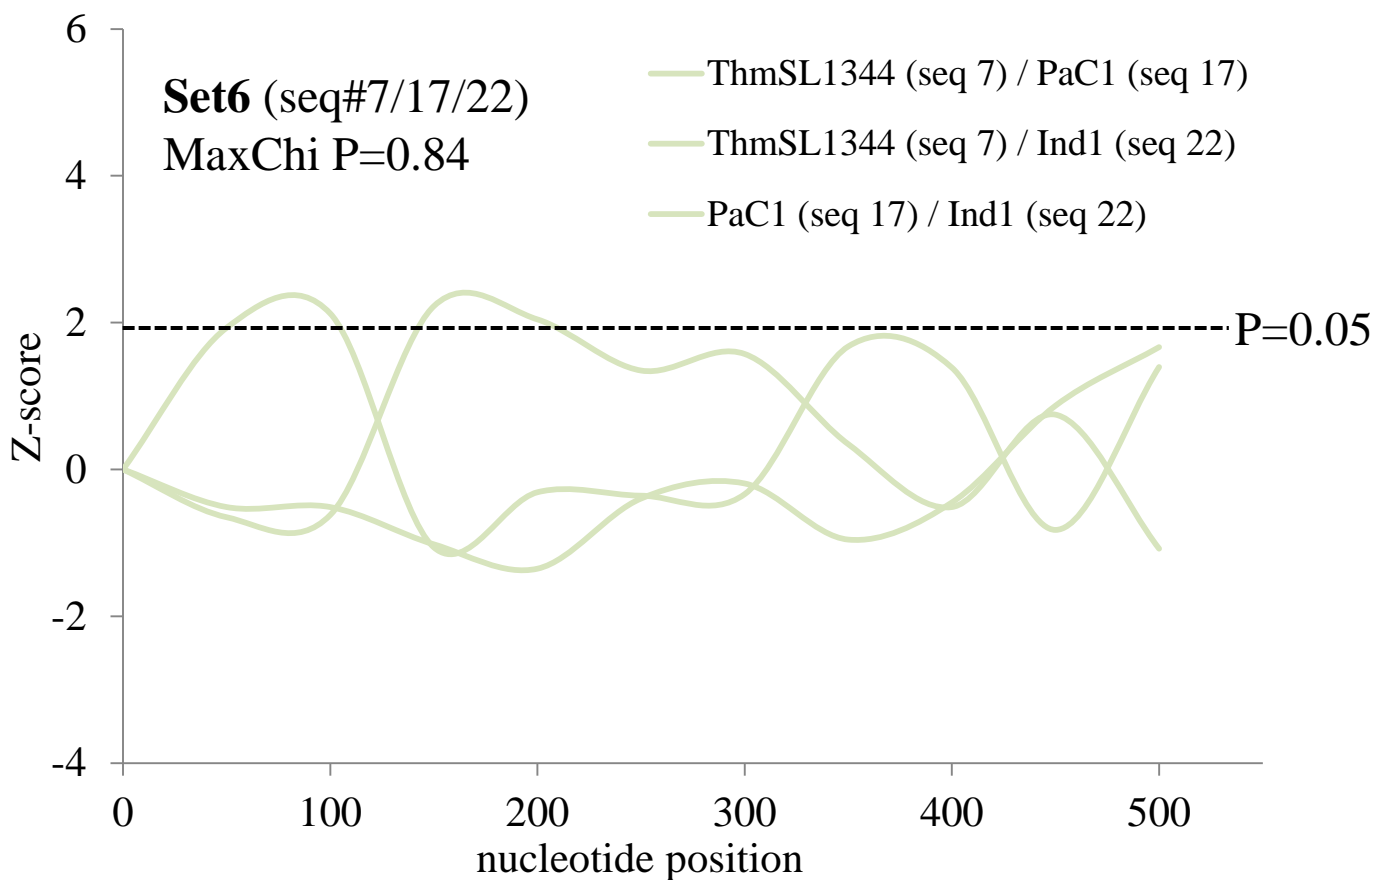

**Figure S3**



# B. S. enterica

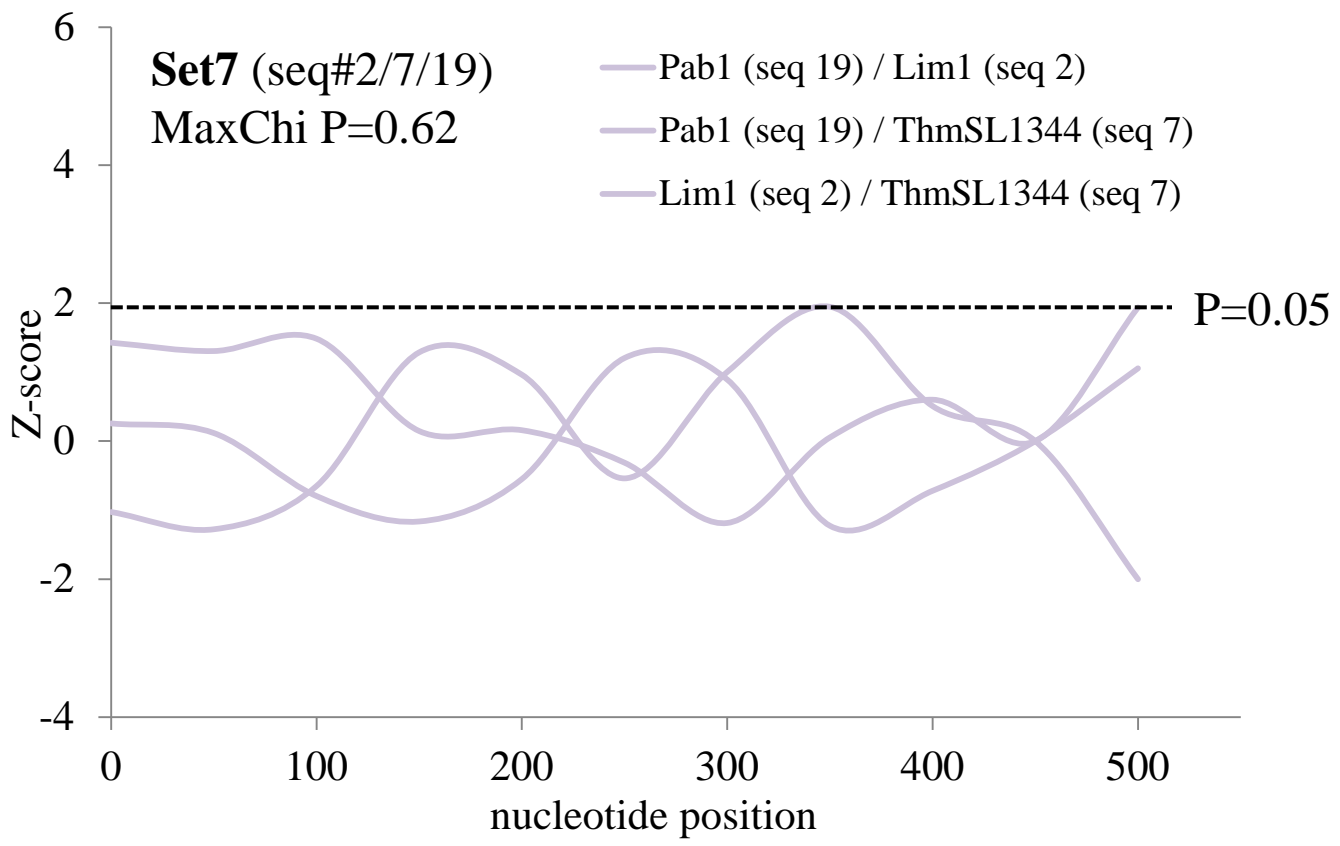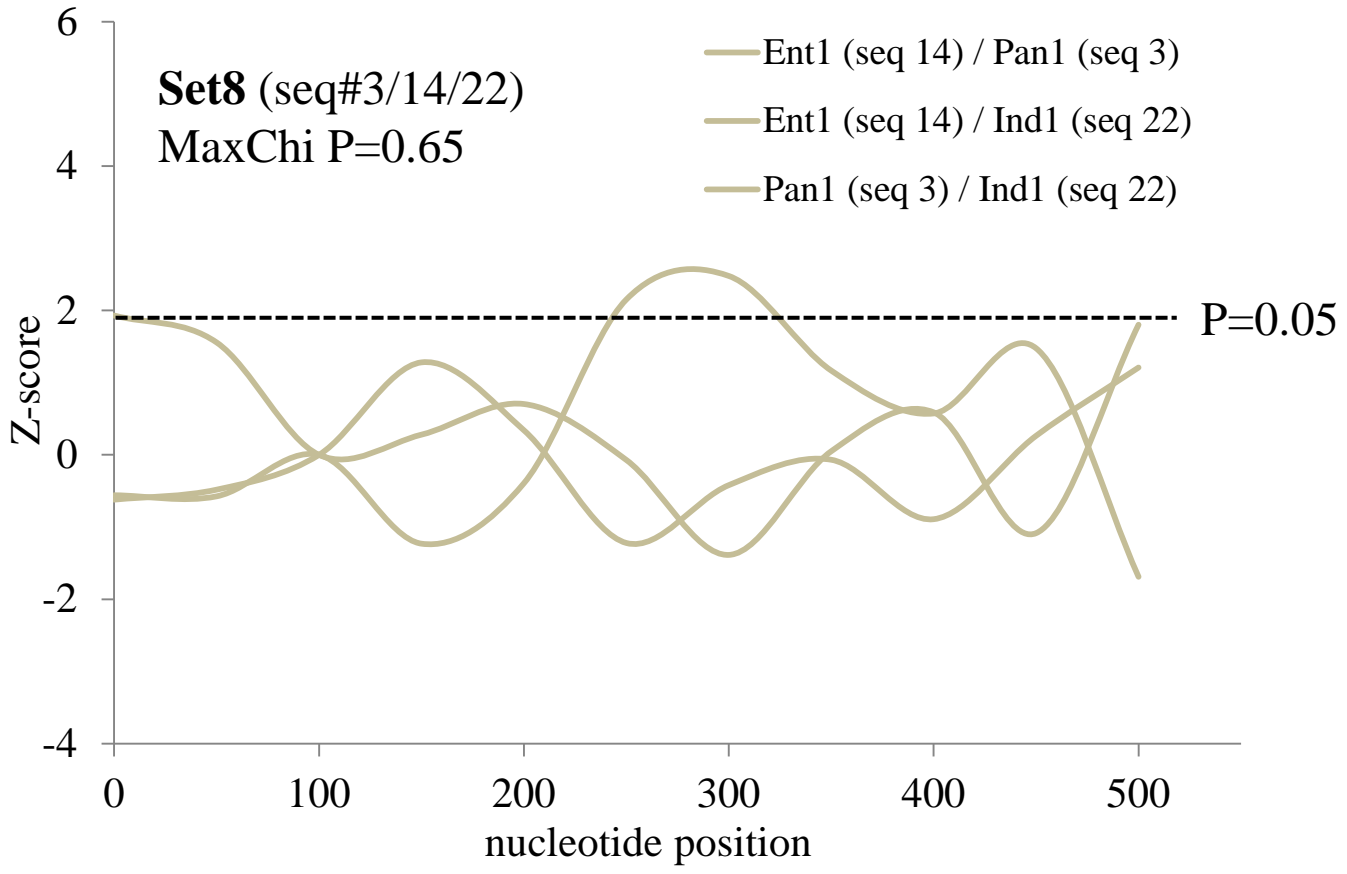

**Figure S3**

## B. *S. enterica*

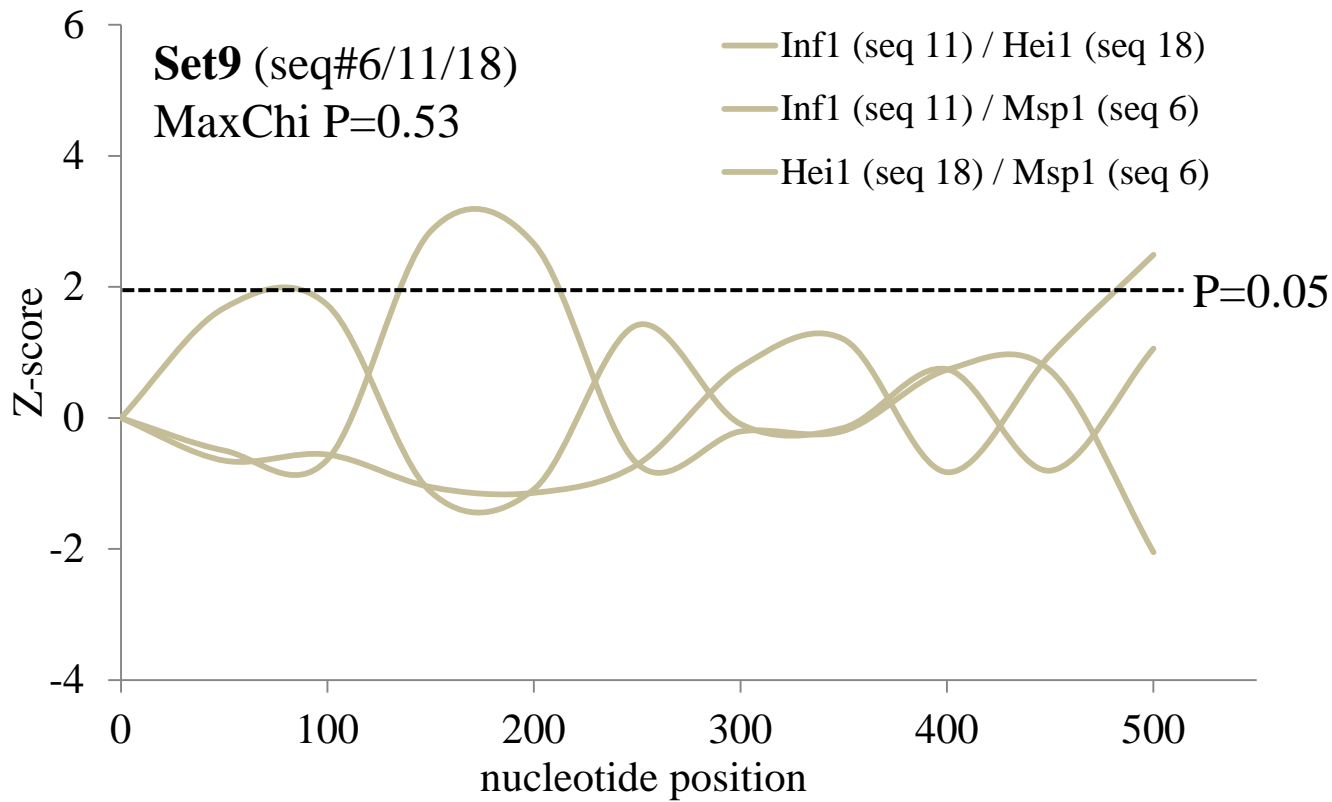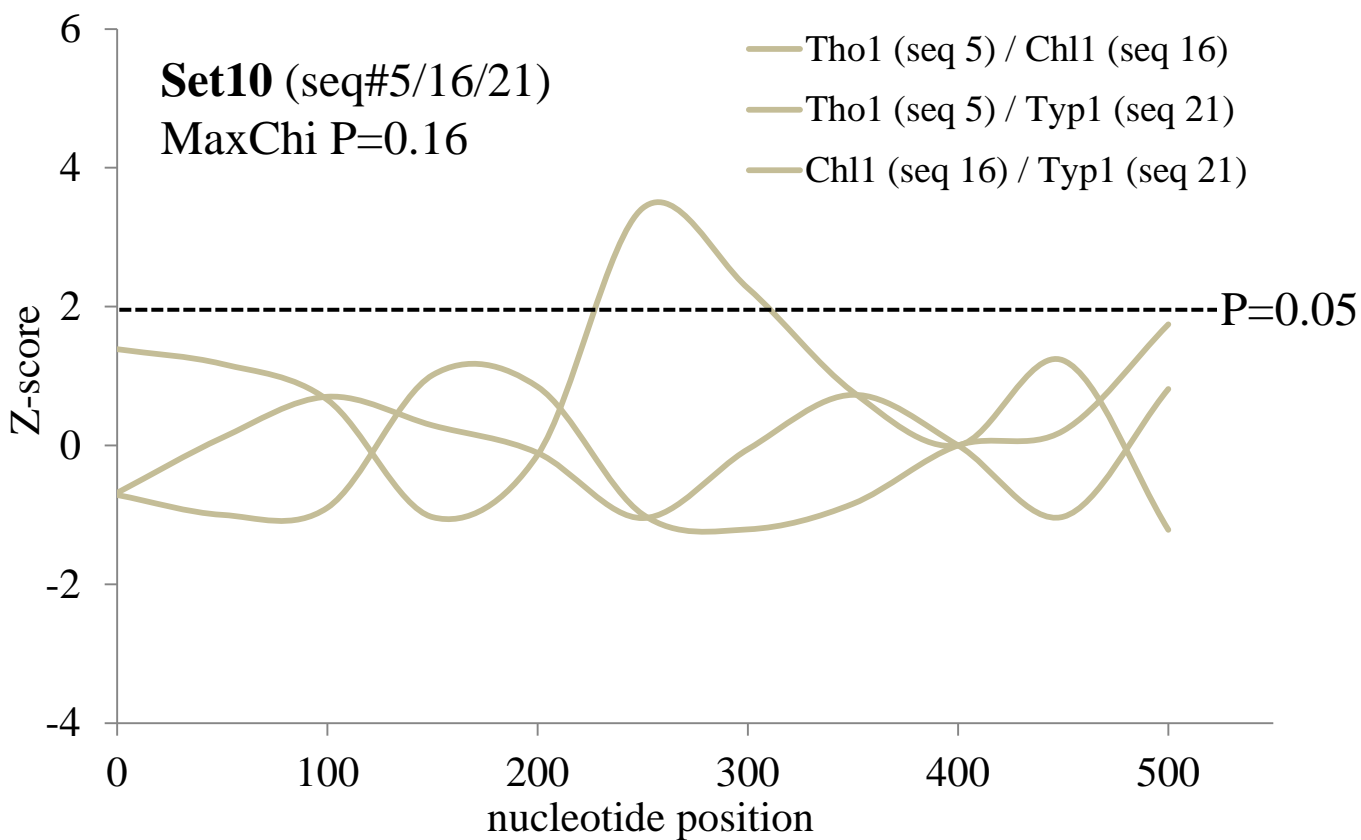

**Figure S3**
