# Supplementary figures and images for: Evolutionary Analysis Points to Divergent Physiological Roles of Type 1 Fimbriae in Salmonella and Escherichia coli
Source: PubMed Central journal article supplement — mBio. 2013 Mar 5;4(2):e00625-12. doi: 10.1128/mBio.00625-12 (PMC3604780; doi:10.1128/mbio.00625-12), 2013-03-05

Figure S1

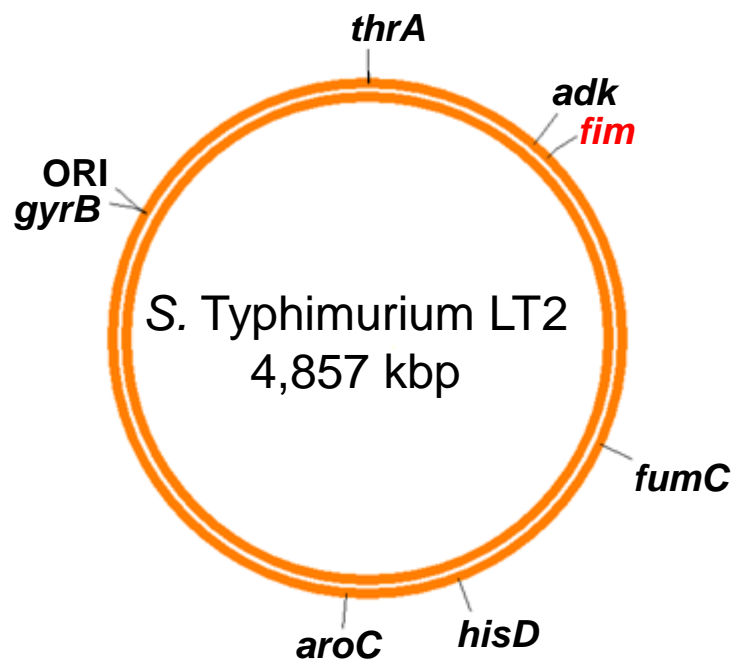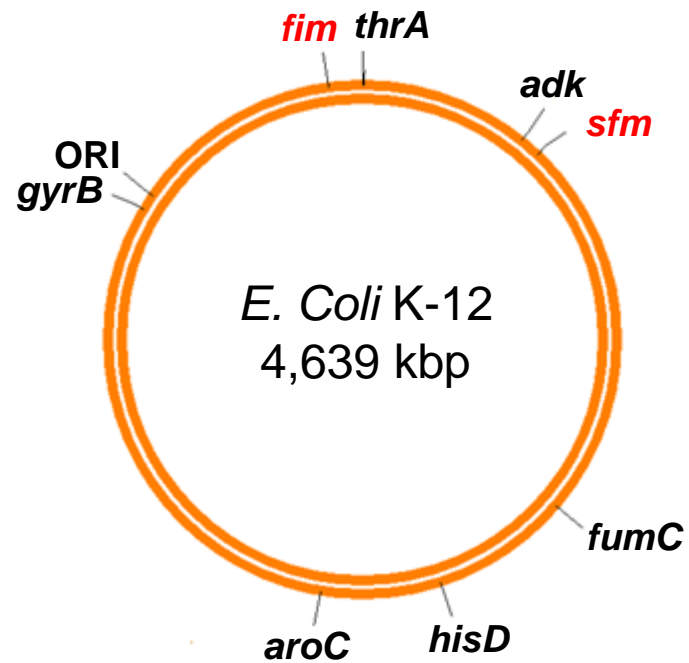

Supplement: mbo001131459sf01.pdf [file mbo001131459sf01.pdf]

Figure S2A

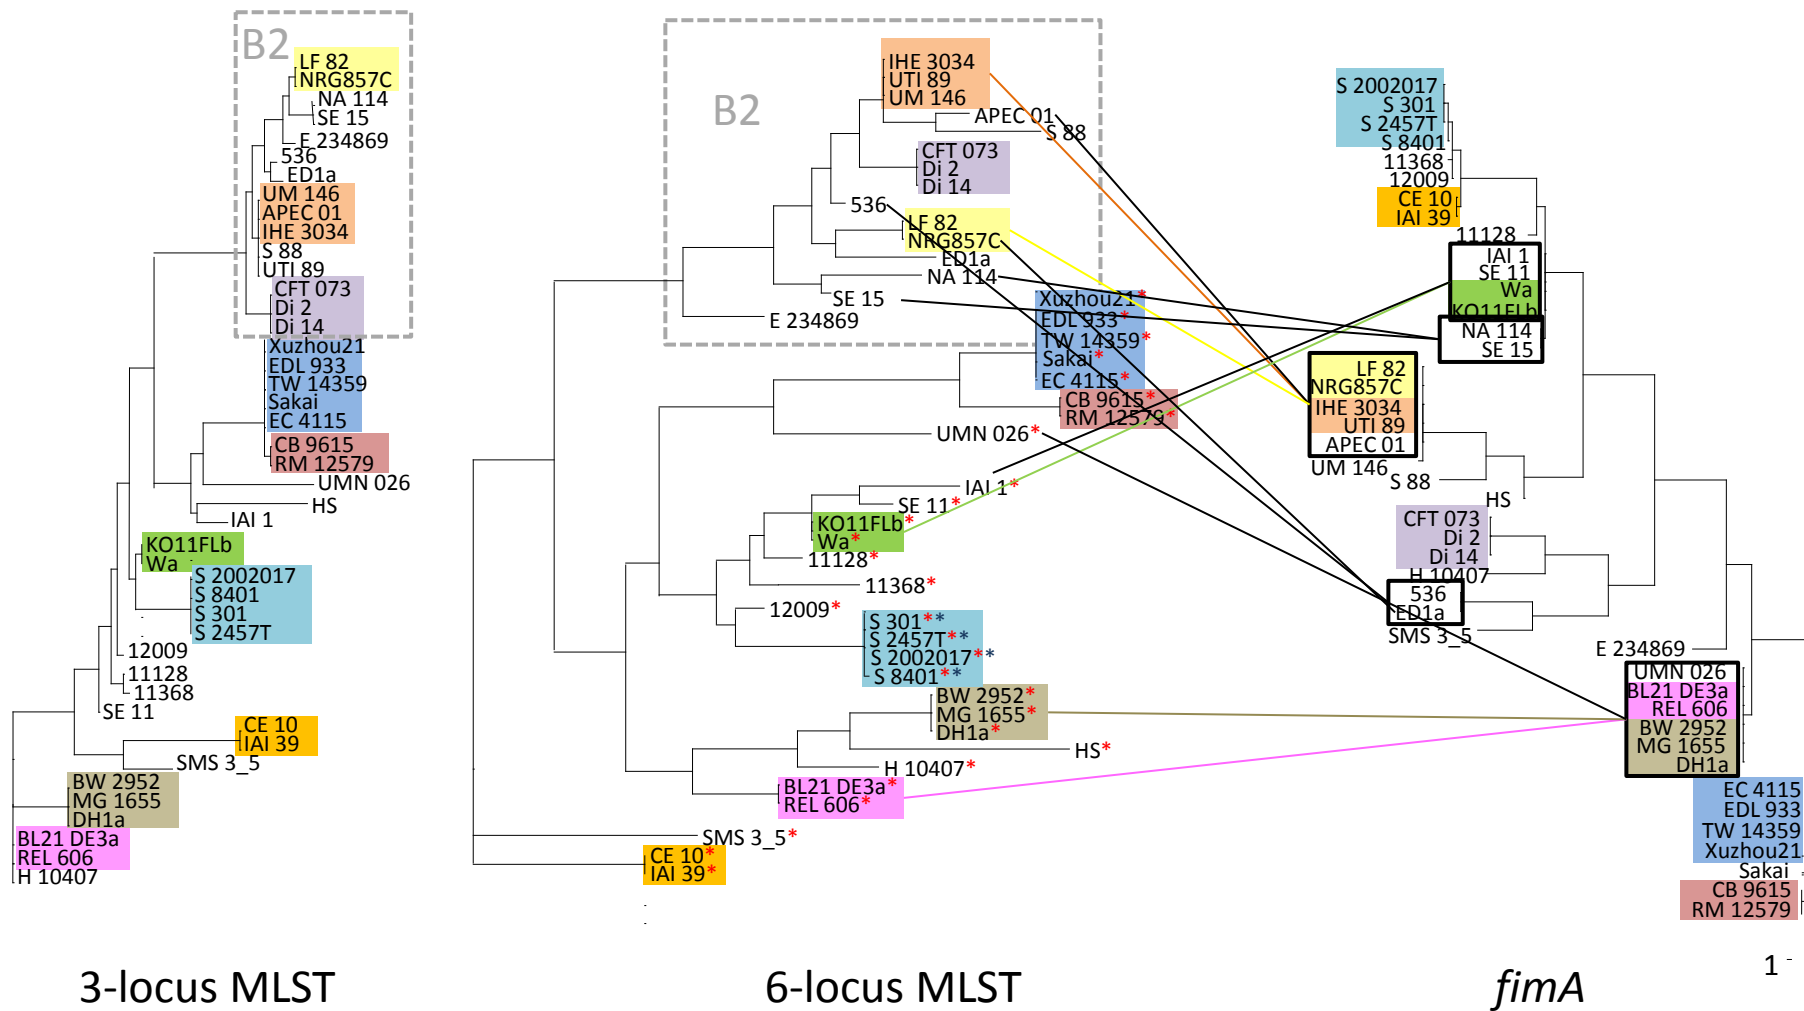

Figure S2B

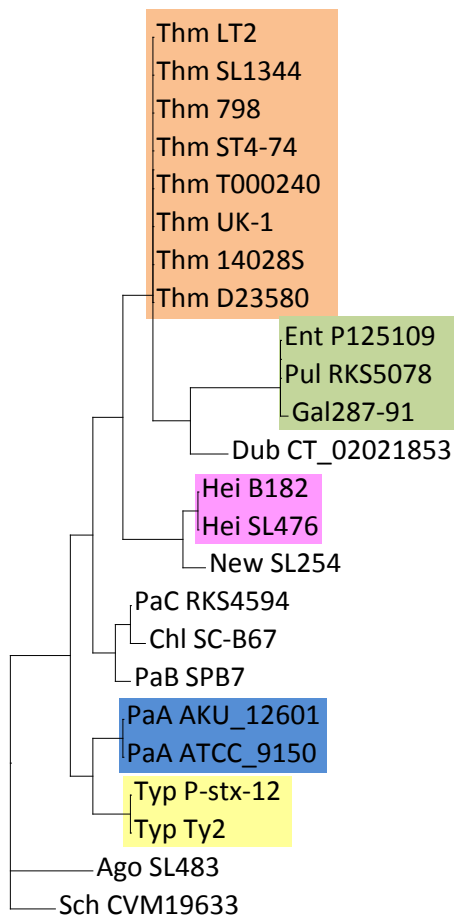

3-locus MLST

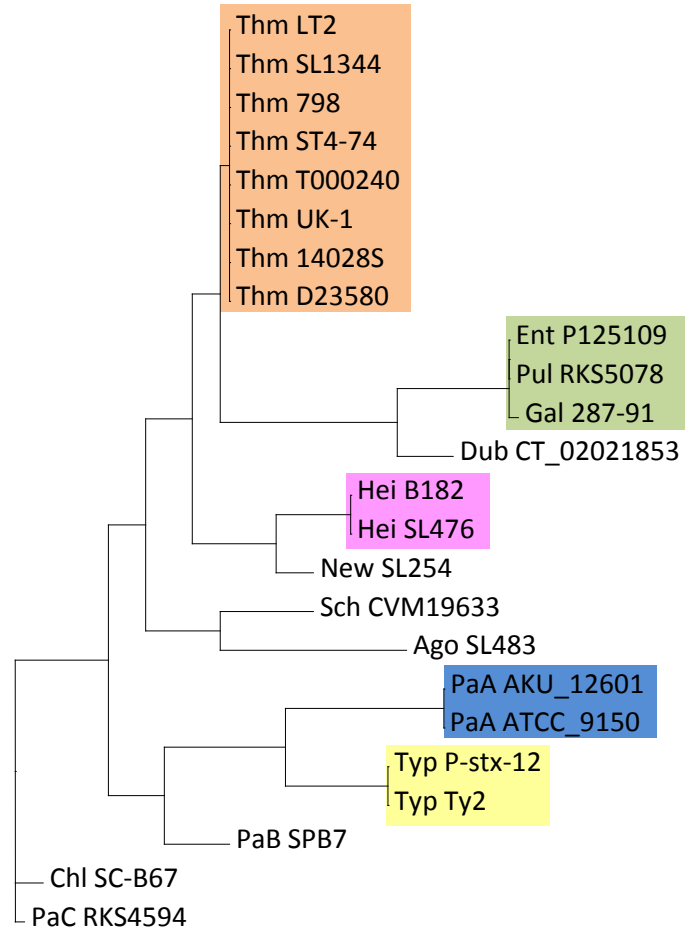

6-locus MLST

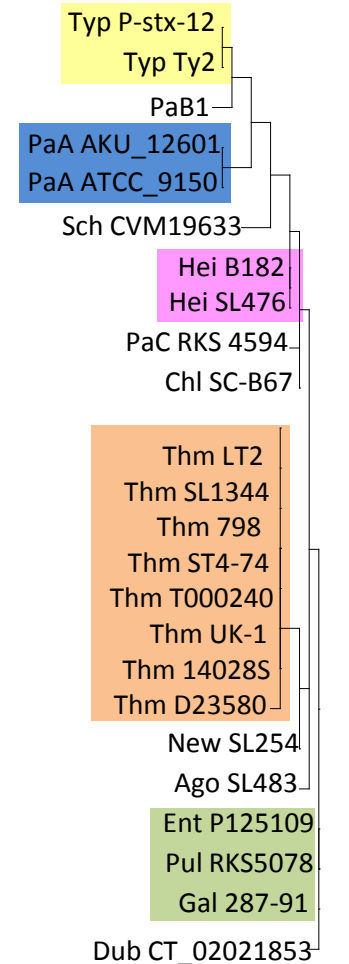

*fimA*

Supplement: mbo001131459sf02.pdf [file mbo001131459sf02.pdf]
